# Supplementary material
Source: PubMed Central journal article supplement (PMC3353740)
Supplement: Supp_Data.pdf [file Supp_Data.pdf]

## Supplementary Data

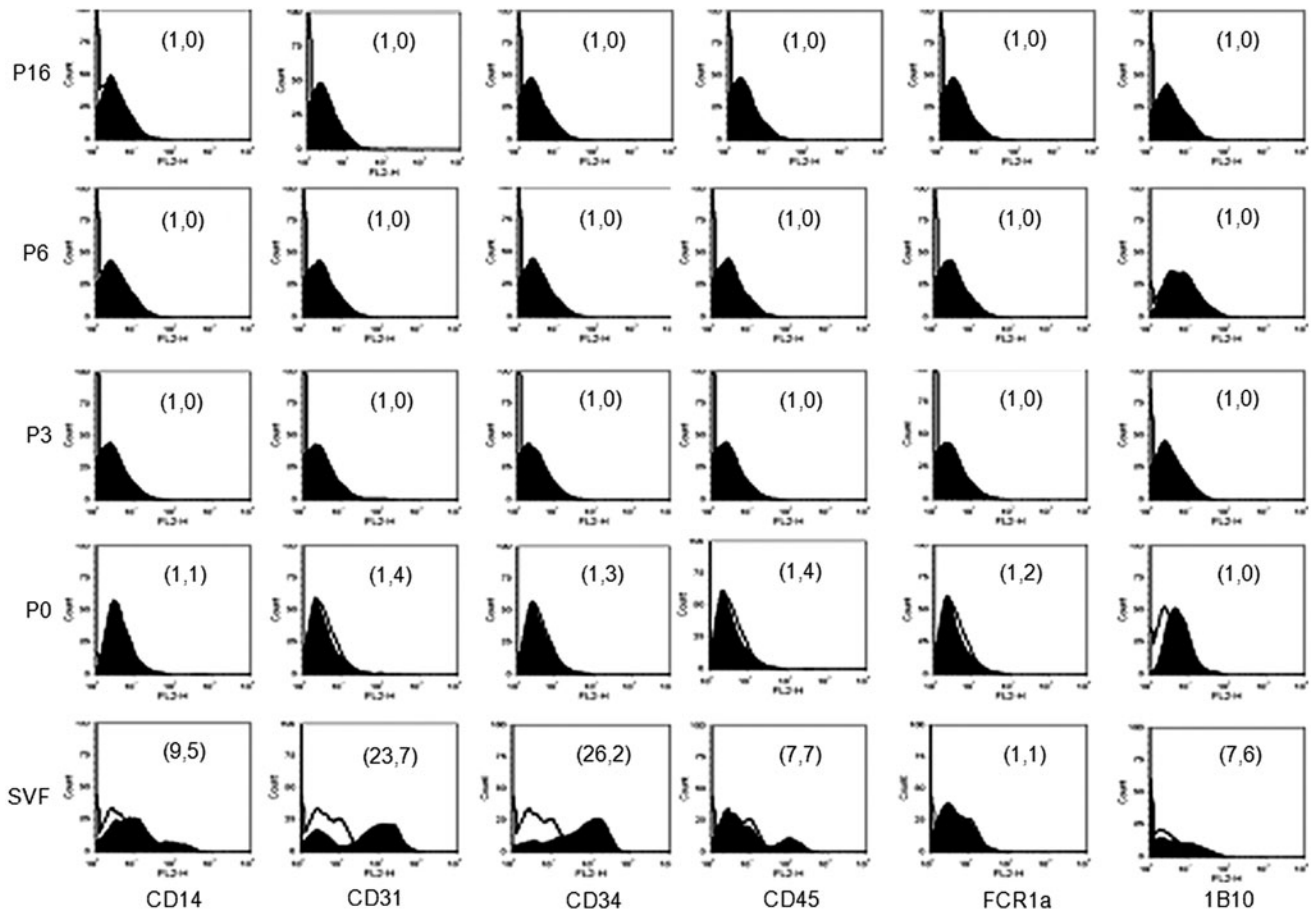

**SUPPLEMENTARY FIG. S1.** Heterogeneity of cell preparations among different passages. A representative histogram of the expression of CD14, CD31, CD34, CD45, FCR1a, and 1B10 in hASCs. The SVF and passages 0, 3, 6, and 16 are depicted. Histograms are performed over the gated population selected based on FSC/SSC properties. **Black bold** histograms show the marker expression, and *empty lines* represent the negative control. Values represent the MRFI calculated by dividing the MFI by its negative control (*numbers in brackets*). hASC, human adipose-derived stem cell; SVF, stromal vascular fraction; MRFI, mean relative fluorescence intensity; MFI, mean fluorescent intensity.

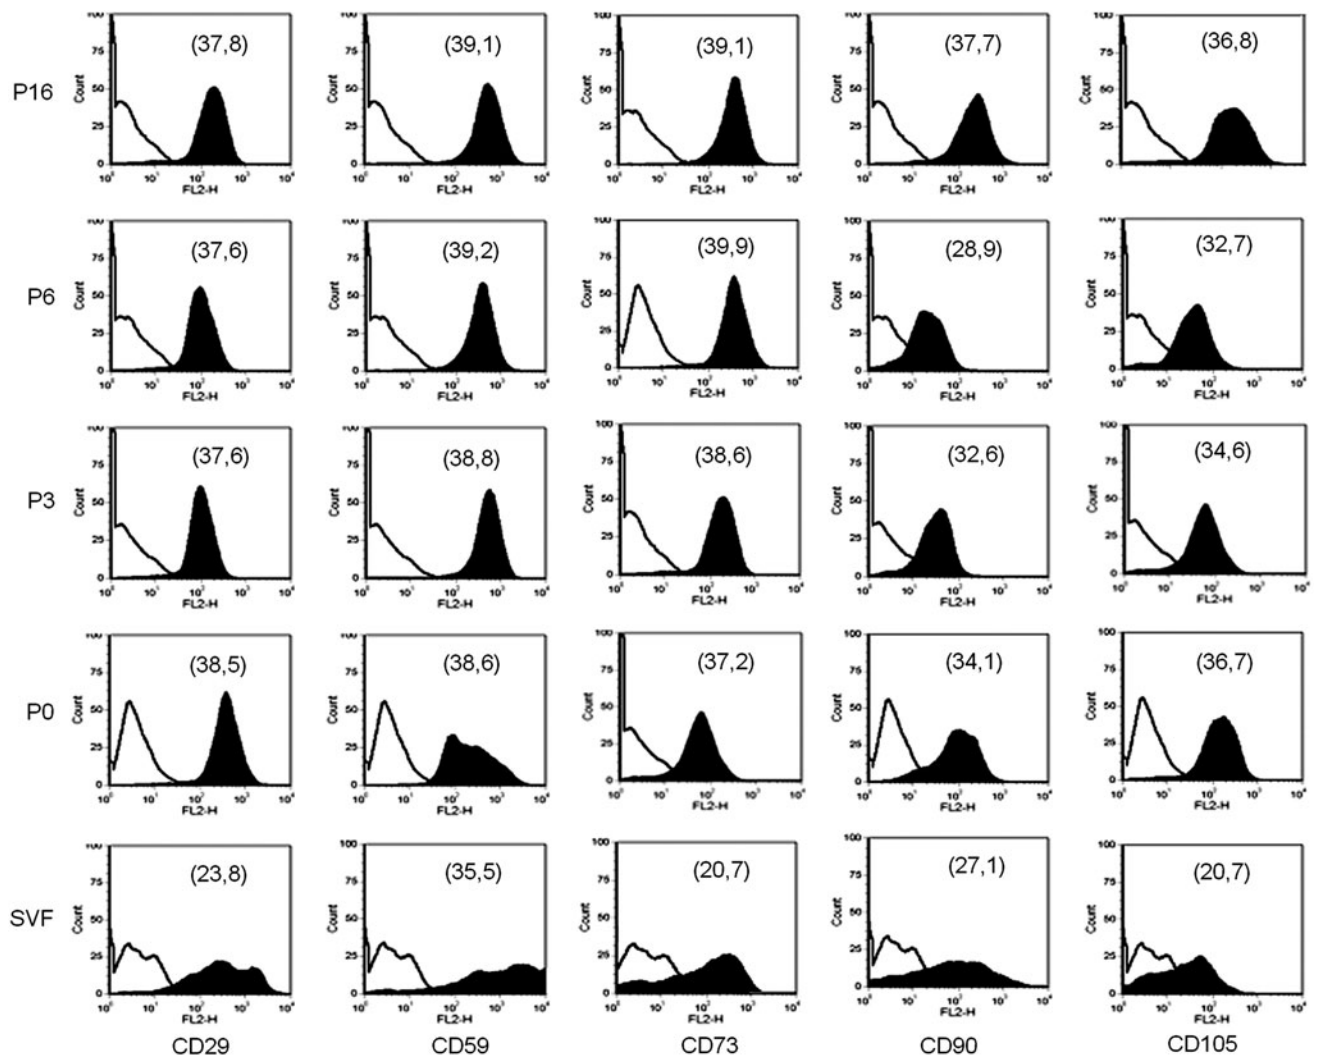

**SUPPLEMENTARY FIG. S2.** Stability of mesenchymal antigen expression by hASCs among different passages. A representative histogram of the expression of CD29, CD59, CD73, CD90, and CD105 in hASCs. The SVF and passages 0, 3, 6, and 16 are depicted. Histograms are performed over the gated population selected based on FSC/SSC properties. *Black bold* histograms show the marker expression, and *empty lines* represent the negative control. Values represent the MRFI calculated by dividing the MFI by its negative control (*numbers in brackets*).

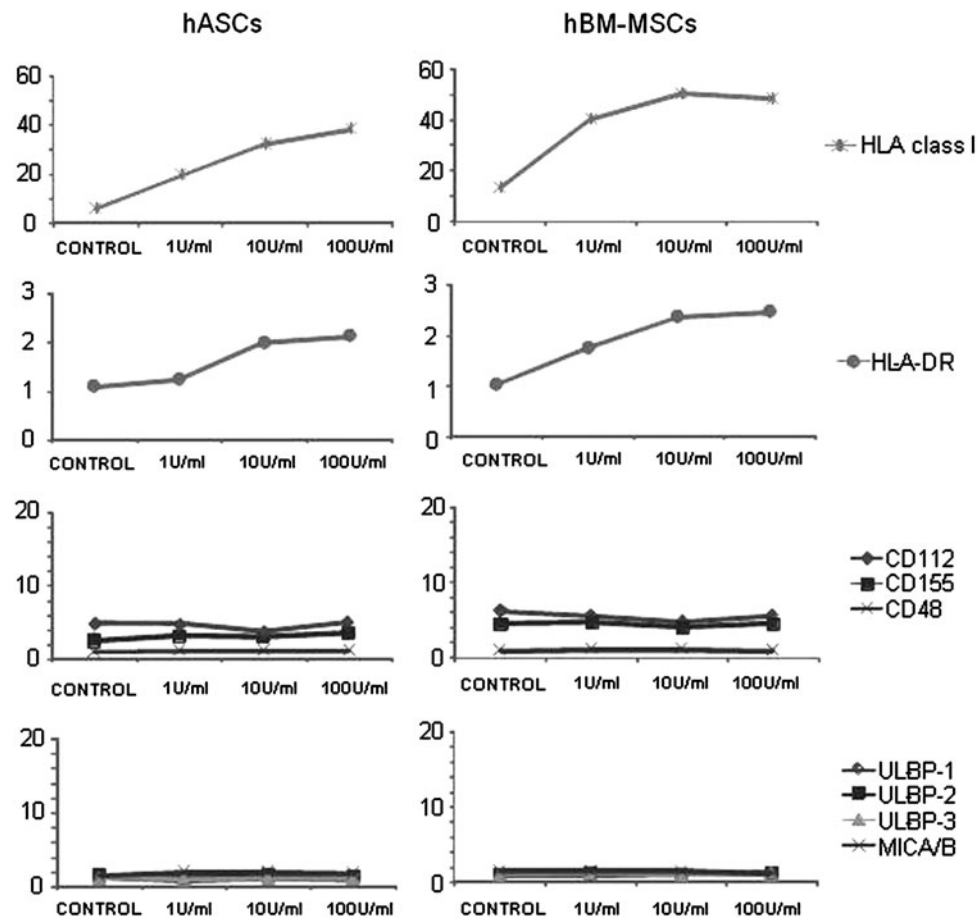

**SUPPLEMENTARY FIG. S3.** Expression of HLA molecules and ligands for NK activating receptors in hASCs and hBM-MSCs under IFN- $\gamma$  stimulation. The hASCs and hBM-MSCs were stimulated for 72 h with IFN- $\gamma$  at 1, 10, and 100 U/mL. The graphs represent the MRFI from 4 independent experiments. HLA, histocompatible locus antigen; IFN- $\gamma$ , interferon  $\gamma$ ; hBM-MSCs, human bone marrow-mesenchymal stem cells.
